# Supplementary material for: A designer 32-electron superatomic CBe8H12 cluster: core–shell geometry, octacoordinate carbon, and cubic aromaticity
Source: Royal Society of Chemistry journal article supplement (doi:10.1039/d0nj00778a), 2020-01-01
Supplement: d0nj00778a1.pdf [file d0nj00778a1.pdf]

## SUPPLEMENTARY INFORMATION

### A Designer 32-Electron Superatomic CBe<sub>8</sub>H<sub>12</sub> Cluster: Core-Shell Geometry, Octacoordinate Carbon, and Cubic Aromaticity

Jin-Chang Guo,<sup>+a,b</sup> Lin-Yan Feng,<sup>+a</sup> Chuan Dong,<sup>b</sup> and Hua-Jin Zhai\*<sup>a</sup>

<sup>a</sup>*Nanocluster Laboratory, Institute of Molecular Science, Shanxi University, Taiyuan 030006, China*

<sup>b</sup>*Institute of Environmental Science, Center of Environmental Science and Engineering Research, Shanxi University, Taiyuan 030006, China*

E-mail: hj.zhai@sxu.edu.cn

<sup>+</sup> These authors contributed equally to this work.

**Table S1.** Cartesian coordinates for optimized structures of CBe<sub>8</sub>H<sub>12</sub> (**1**), Be<sub>8</sub>H<sub>12</sub><sup>2+</sup> (**2**), and NBe<sub>8</sub>H<sub>12</sub><sup>+</sup> (**3**) clusters and their three lowest-lying isomers (**nB–nD**) at the PBE0-D3/def2-TZVPP level.

**Table S2.** Calculated Wiberg bond indices (WBIs), natural atomic charges (q, in |e|), and HOMO–LUMO energy gaps (Gap, in eV) of clusters **1–3** at the PBE0-D3/def2-TZVPP level. Nucleus independent chemical shifts (NICSs) are also presented at the PBE0/def2-TZVPP level.

**Table S3.** Composition analysis for occupied canonical molecular orbitals (CMOs) of neutral CBe<sub>8</sub>H<sub>12</sub> (**1**, O<sub>h</sub>, <sup>1</sup>A<sub>1g</sub>) cluster. Main components greater than 20% are shown in **bold**.

- Table S4.** Composition analysis for occupied CMOs of  $\text{Be}_8\text{H}_{12}^{2+}$  (**2**,  $O_h$ ,  $^1A_{1g}$ ) cluster. Main components greater than 20% are shown in **bold**.
- Figure S1.** Optimized global-minimum (GM) structures of a series of cubic clusters,  $\text{CBe}_8\text{H}_{12}$  (**1**),  $\text{Be}_8\text{H}_{12}^{2+}$  (**2**), and  $\text{NBe}_8\text{H}_{12}^+$  (**3**), at the PBE0-D3/def2-TZVPP level, along with their three lowest-lying isomers (**nB–nD**). Relative energies are listed in  $\text{kcal mol}^{-1}$  at the single-point CCSD(T) level, with zero-point energy (ZPE) corrections at PBE0-D3.
- Figure S2.** Calculated Wiberg bond indices (WBIs; blue color) and natural atomic charges (in  $|e|$ ; red color) of neutral  $\text{CBe}_8\text{H}_{12}$  (**1**,  $O_h$ ,  $^1A_{1g}$ ) cluster at the PBE0-D3/def2-TZVPP level.
- Figure S3.** Root-mean-square deviations (RMSDs) of cluster  $\text{CBe}_8\text{H}_{12}$  (**1**) during the Born-Oppenheimer molecular dynamics (BOMD) simulations at selected temperatures of 300, 600, 900, and 1200 K.
- Figure S4.** Canonical molecular orbitals (CMOs) of  $\text{Be}_8\text{H}_{12}^{2+}$  (**2**). (a) Twelve  $\sigma$  CMOs for 3c-2e Be–H–Be  $\sigma$  bonds. (b) One globally delocalized CMO, which is  $\sigma$  in nature as long as the complementary contributions from bridging H atoms are taken into account.
- Figure S5.** Optimized quasi-linear chain nanostructures of the  $(\text{CBe}_8\text{H}_{12})_2$ ,  $(\text{CBe}_8\text{H}_{12})_3$ , and  $(\text{CBe}_8\text{H}_{12})_4$  clusters at the PBE0/def2-TZVP level.

**Table S2.** Calculated Wiberg bond indices (WBIs), natural atomic charges ( $q$ , in  $|e|$ ), and HOMO–LUMO energy gaps (Gap, in eV) of clusters **1–3** at the PBE0-D3/def2-TZVPP level. Nucleus independent chemical shifts (NICSs) are also presented at the PBE0/def2-TZVPP level.

| Species                                                    | WBI <sup>a</sup> |       |      | $q^a$ |      |       | Gap  | NICS(0) <sup>b</sup> | NICS(1) <sup>b</sup> | NICS <sup>b</sup> |
|------------------------------------------------------------|------------------|-------|------|-------|------|-------|------|----------------------|----------------------|-------------------|
|                                                            | Be–X             | Be–Be | Be–H | X     | Be   | H     |      | Surface              | 1 Å above face       | Center            |
| CBe <sub>8</sub> H <sub>12</sub> ( <b>1</b> )              | 0.38             | 0.19  | 0.47 | –1.84 | 0.50 | –0.18 | 7.44 | –24.2                | –4.1                 | –                 |
| Be <sub>8</sub> H <sub>12</sub> <sup>2+</sup> ( <b>2</b> ) | –                | 0.21  | 0.44 | –     | 0.64 | –0.26 | 5.28 | –9.6                 | –1.1                 | –18.8             |
| NBe <sub>8</sub> H <sub>12</sub> <sup>+</sup> ( <b>3</b> ) | 0.25             | 0.18  | 0.47 | –1.64 | 0.63 | –0.20 | 9.10 | –18.3                | –2.8                 | –                 |

<sup>a</sup> The central atom is denoted as “X”, which represents C and N in clusters **1/3**, respectively.

<sup>b</sup> NICS(0) is calculated at the cluster surface (that is, the center of a Be<sub>4</sub> square), whereas NICS(1) is at 1 Å above the square. Also shown is NICS at cubic center of cluster **2**.

**Table S3.** Composition analysis for occupied canonical molecular orbitals (CMOs) of neutral  $\text{CBe}_8\text{H}_{12}$  (**1**,  $O_h$ ,  $^1A_{1g}$ ) cluster. Main components greater than 20% are shown in **bold**.

| CMO                                                                                                      | C (%)       |             | Be <sub>8</sub> (%) |             | H <sub>12</sub> (%) |
|----------------------------------------------------------------------------------------------------------|-------------|-------------|---------------------|-------------|---------------------|
|                                                                                                          | 2s          | 2p          | 2s                  | 2p          | 1s                  |
| $2F^6$<br>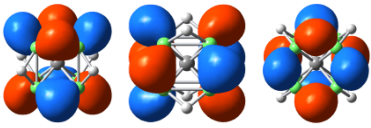<br>HOMO-1    | -           | -           | -                   | <b>36.7</b> | <b>63.3</b>         |
| $2D^{10}$<br><br>HOMO-2 | -           | -           | 13.6                | <b>26.4</b> | <b>60.0</b>         |
| <br>HOMO-3             | -           | -           | -                   | <b>49.3</b> | <b>50.7</b>         |
| $2P^6$<br><br>HOMO-5  | <b>37.5</b> | -           | 15.5                | 18.8        | <b>28.2</b>         |
| $2S^2$<br><br>HOMO-4  | 11.9        | -           | <b>22.7</b>         | 5.4         | <b>60.0</b>         |
| $1P^6$<br><br>HOMO    | -           | <b>40.3</b> | 6.0                 | <b>22.5</b> | <b>31.2</b>         |
| $1S^2$<br><br>HOMO-6  | <b>47.4</b> | -           | 21.0                | <b>28.5</b> | 3.1                 |

**Table S4.** Composition analysis for occupied CMOs of  $\text{Be}_8\text{H}_{12}^{2+}$  ( $2, O_h, {}^1A_{1g}$ ) cluster. Main components greater than 20% are shown in **bold**.

| CMO              |                                                                                               | Be <sub>8</sub> (%) |             | H <sub>12</sub> (%) |
|------------------|-----------------------------------------------------------------------------------------------|---------------------|-------------|---------------------|
|                  |                                                                                               | 2s                  | 2p          | 1s                  |
| 2F <sup>6</sup>  | 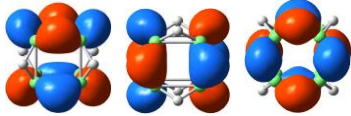<br>HOMO-1   | -                   | <b>28.8</b> | <b>71.2</b>         |
|                  | <br>HOMO-2   | -                   | <b>39.8</b> | <b>60.2</b>         |
| 2D <sup>10</sup> | <br>HOMO-3   | 15.8                | 19.2        | <b>65.0</b>         |
|                  | <br>HOMO-4 | <b>29.6</b>         | 19.9        | <b>50.5</b>         |
| 2P <sup>6</sup>  | <br>HOMO-5 | <b>44.0</b>         | 17.8        | <b>38.2</b>         |
| 2S <sup>2</sup>  | <br>HOMO   | -                   | <b>66.3</b> | <b>33.7</b>         |

**Figure S1.** Optimized global-minimum (GM) structures of a series of cubic clusters,  $\text{CBe}_8\text{H}_{12}$  (**1**),  $\text{Be}_8\text{H}_{12}^{2+}$  (**2**), and  $\text{NBe}_8\text{H}_{12}^+$  (**3**), at the PBE0-D3/def2-TZVPP level, along with their three lowest-lying isomers (**nB–nD**). Relative energies are listed in  $\text{kcal mol}^{-1}$  at the single-point CCSD(T) level, with zero-point energy (ZPE) corrections at PBE0-D3.

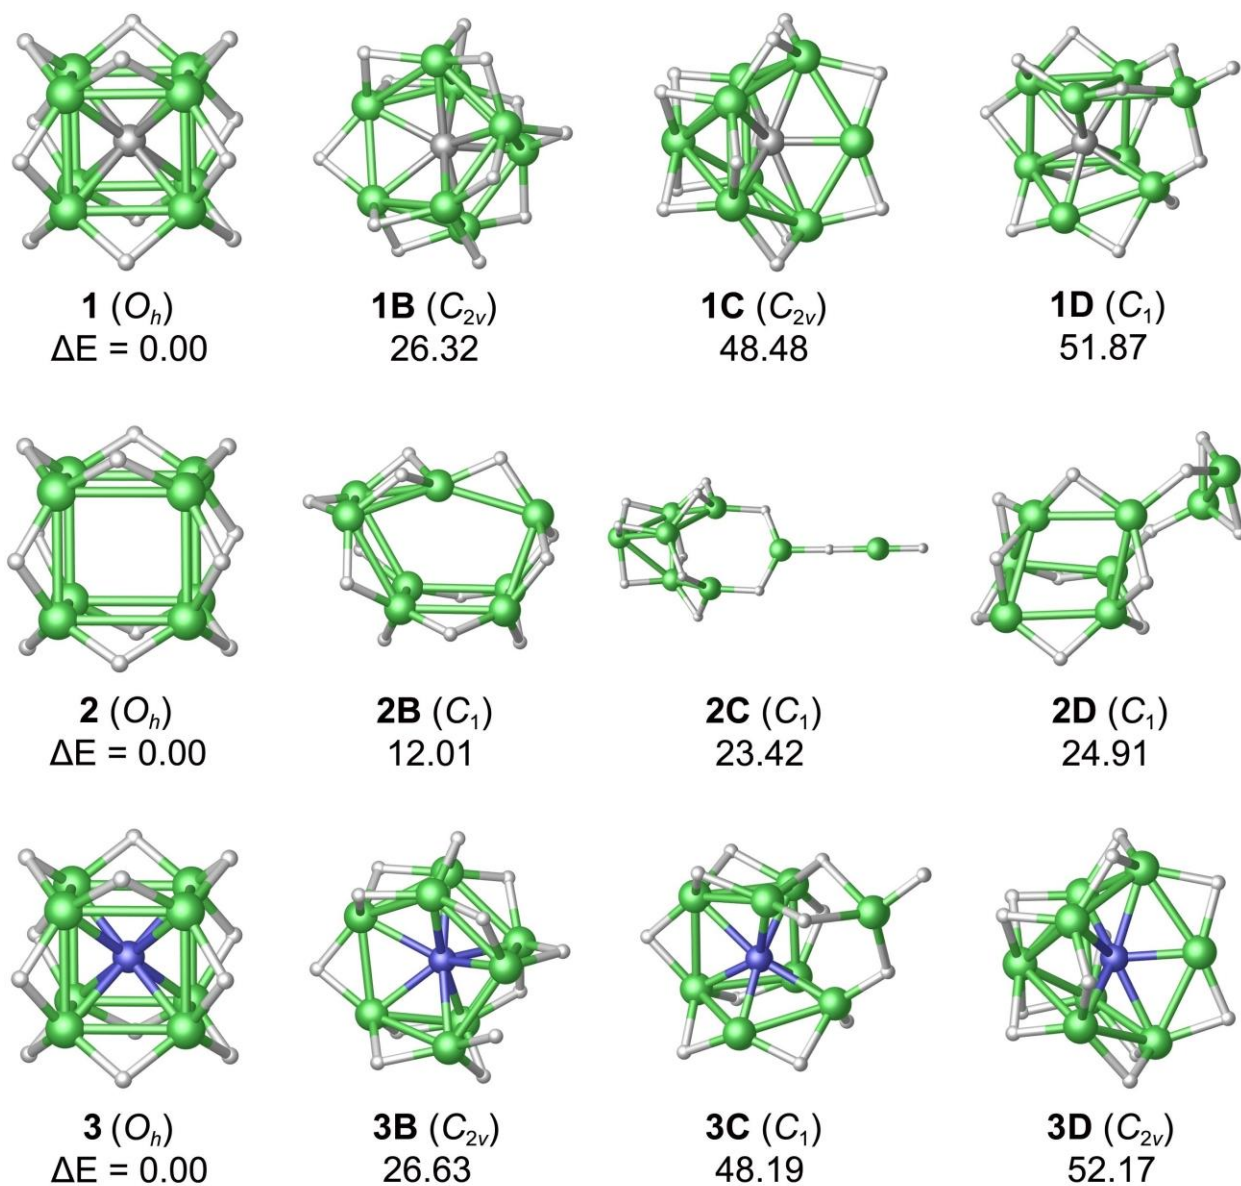

**Figure S2.** Calculated Wiberg bond indices (WBIs; blue color) and natural atomic charges (in |e|; red color) of neutral  $\text{CBe}_8\text{H}_{12}$  (**1**,  $O_h$ ,  $^1A_{1g}$ ) cluster at the PBE0-D3/def2-TZVPP level.

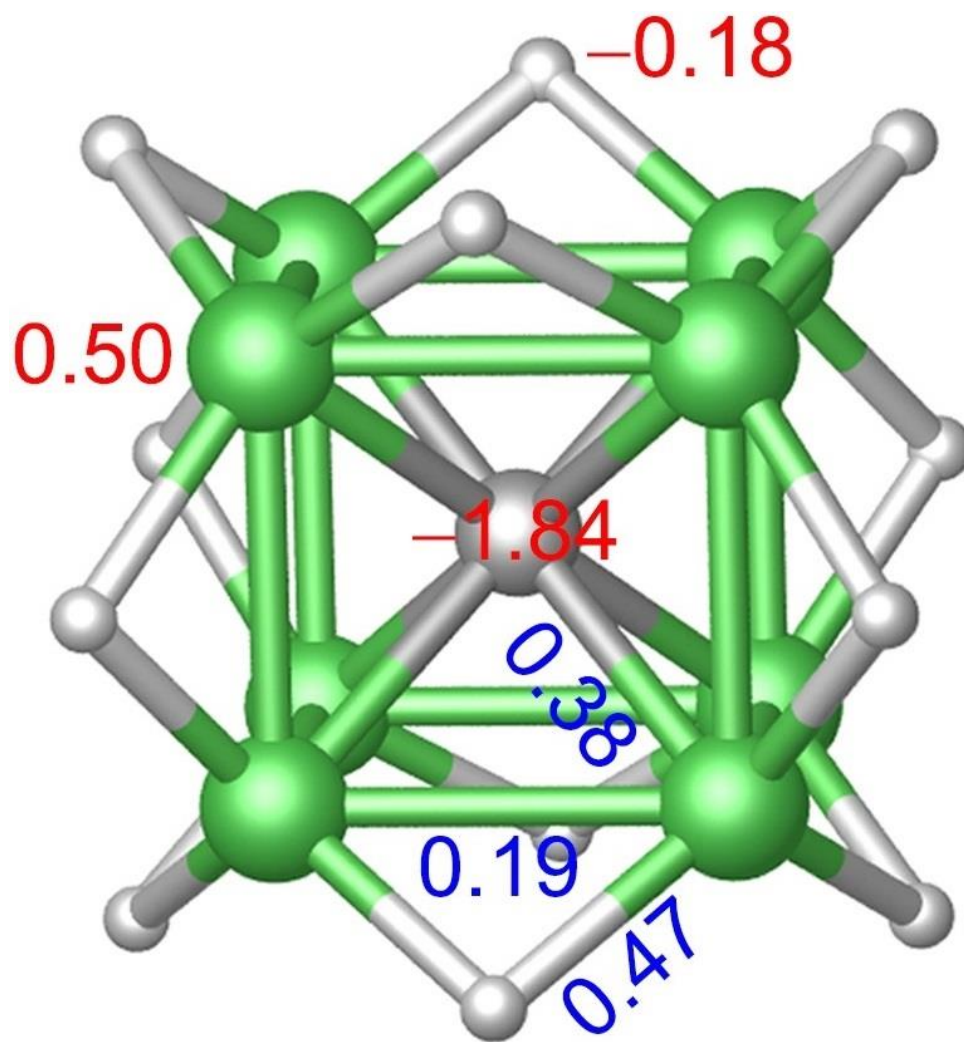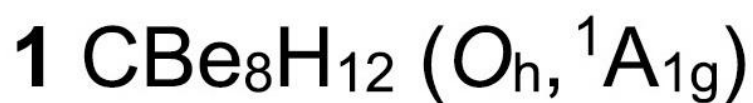

**Figure S3.** Root-mean-square deviations (RMSDs) of cluster  $\text{CBe}_8\text{H}_{12}$  (**1**) during the Born-Oppenheimer molecular dynamics (BOMD) simulations at selected temperatures of 300, 600, 900, and 1200 K.

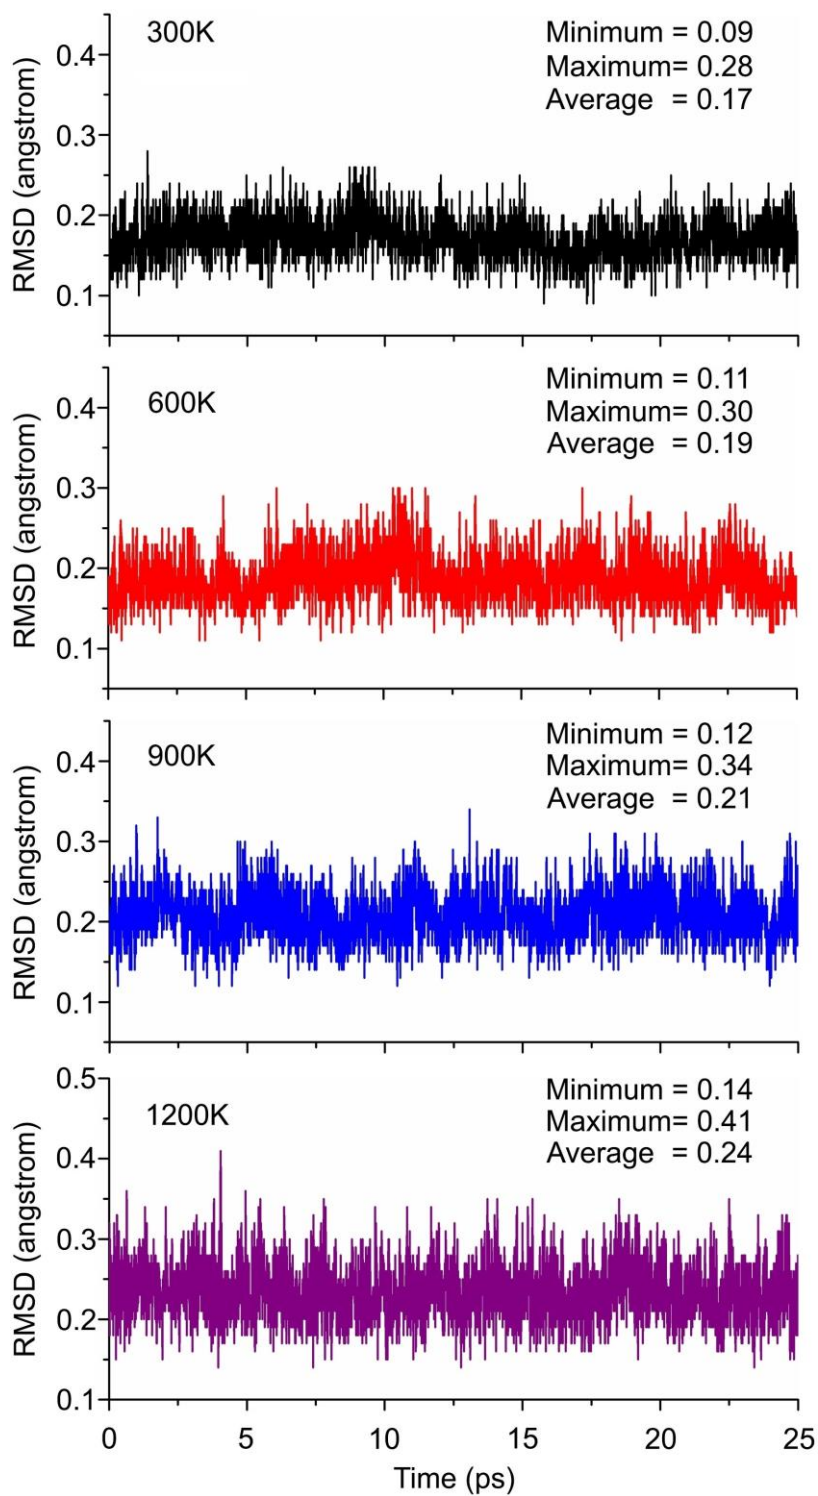



**Figure S4.** Canonical molecular orbitals (CMOs) of  $\text{Be}_8\text{H}_{12}^{2+}$  (**2**). (a) Twelve  $\sigma$  CMOs for 3c-2e Be–H–Be  $\sigma$  bonds. (b) One globally delocalized CMO, which is  $\sigma$  in nature as long as the complementary contributions from bridging H atoms are taken into account.

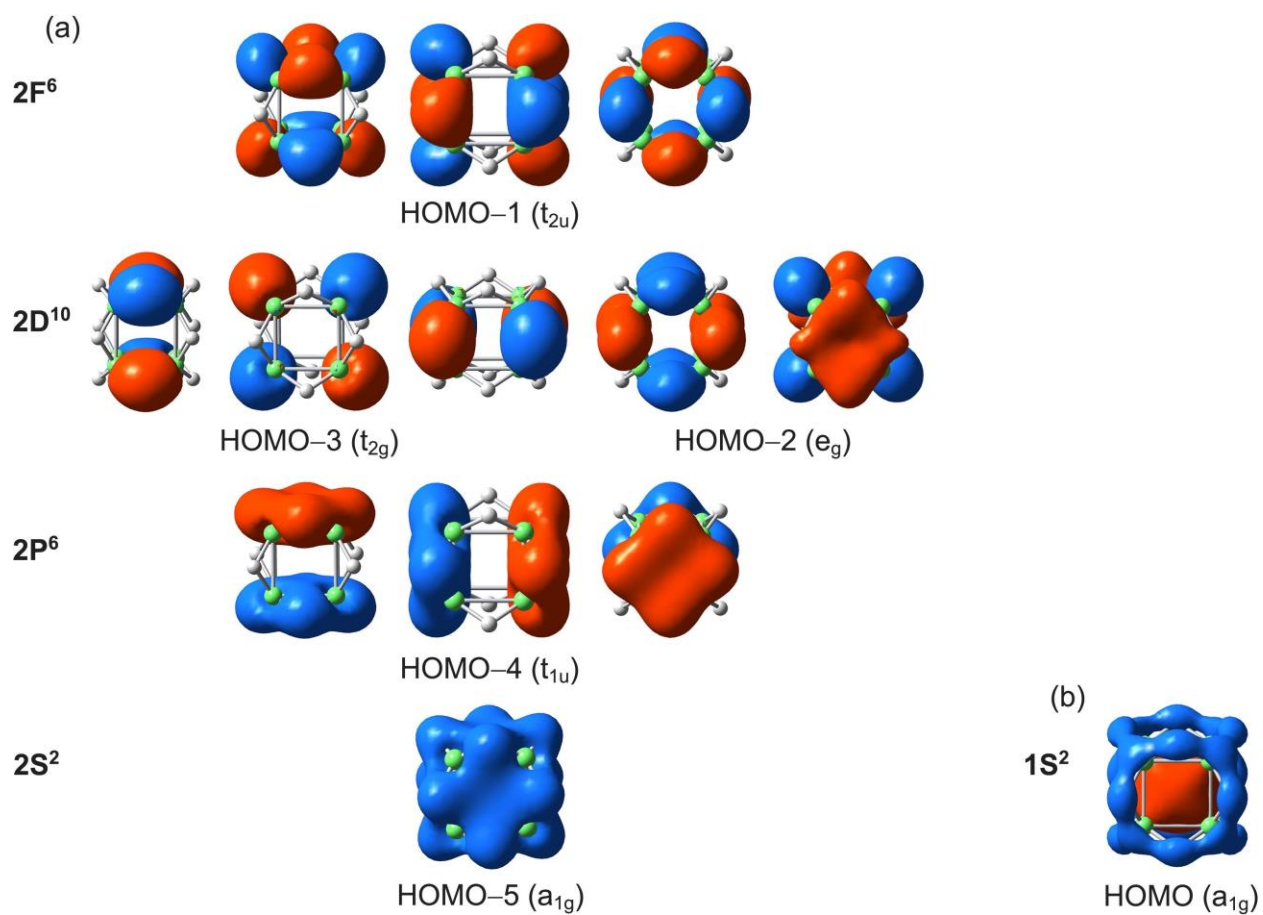

**Figure S5.** Optimized quasi-linear chain nanostructures of the  $(\text{CBe}_8\text{H}_{12})_2$ ,  $(\text{CBe}_8\text{H}_{12})_3$ , and  $(\text{CBe}_8\text{H}_{12})_4$  clusters at the PBE0/def2-TZVP level.

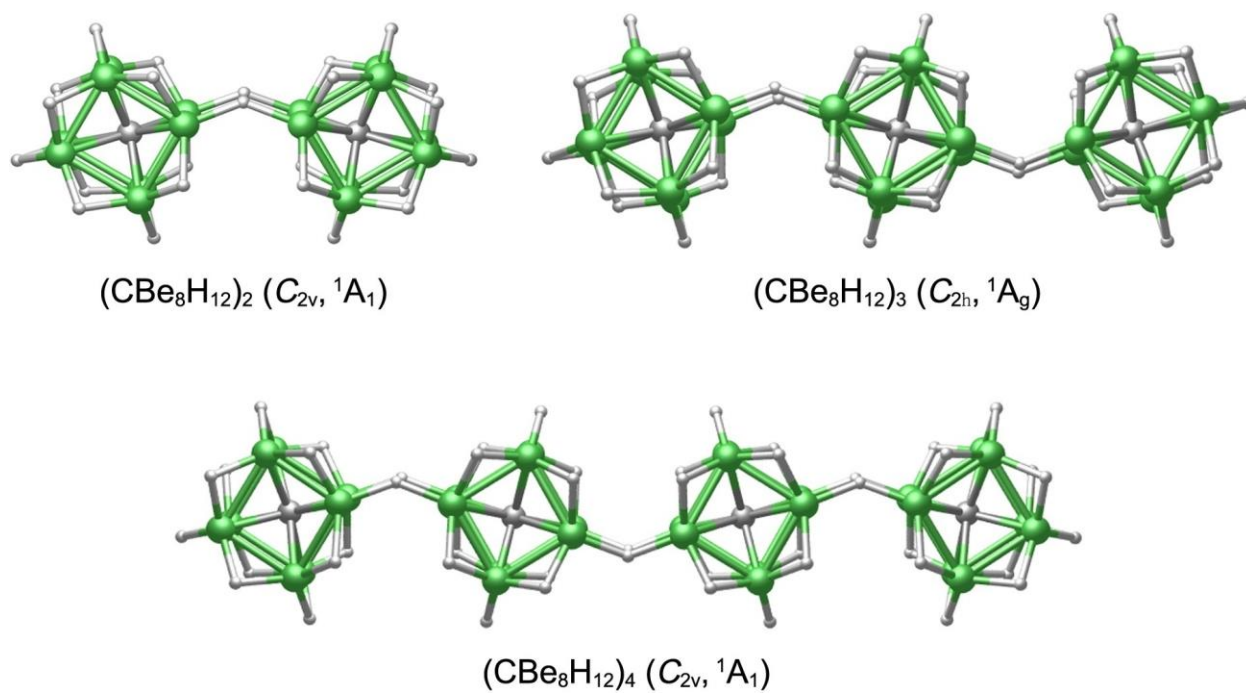

**Table S1.** Cartesian coordinates for optimized structures of  $\text{CBe}_8\text{H}_{12}$  (**1**),  $\text{Be}_8\text{H}_{12}^{2+}$  (**2**), and  $\text{NBe}_8\text{H}_{12}^+$  (**3**) clusters and their three lowest-lying isomers (**nB–nD**) at the PBE0-D3/def2-TZVPP level.

**1**  $O_h$   $\text{CBe}_8\text{H}_{12}$

|    |             |             |             |
|----|-------------|-------------|-------------|
| Be | 1.02990200  | -1.02990200 | 1.02990200  |
| Be | -1.02990200 | -1.02990200 | 1.02990200  |
| Be | -1.02990200 | -1.02990200 | -1.02990200 |
| Be | -1.02990200 | 1.02990200  | -1.02990200 |
| Be | -1.02990200 | 1.02990200  | 1.02990200  |
| Be | 1.02990200  | 1.02990200  | 1.02990200  |
| Be | 1.02990200  | 1.02990200  | -1.02990200 |
| Be | 1.02990200  | -1.02990200 | -1.02990200 |
| H  | 1.77914600  | 0.00000000  | 1.77914600  |
| H  | 1.77914600  | 0.00000000  | -1.77914600 |
| H  | -1.77914600 | 0.00000000  | 1.77914600  |
| H  | -1.77914600 | 0.00000000  | -1.77914600 |
| H  | 1.77914600  | 1.77914600  | 0.00000000  |
| H  | 1.77914600  | -1.77914600 | 0.00000000  |
| H  | -1.77914600 | -1.77914600 | 0.00000000  |
| H  | -1.77914600 | 1.77914600  | 0.00000000  |
| C  | 0.00000000  | 0.00000000  | 0.00000000  |
| H  | 0.00000000  | 1.77914600  | 1.77914600  |
| H  | 0.00000000  | -1.77914600 | 1.77914600  |
| H  | 0.00000000  | -1.77914600 | -1.77914600 |
| H  | 0.00000000  | 1.77914600  | -1.77914600 |

**1B**  $C_{2v}$   $\text{CBe}_8\text{H}_{12}$

|    |             |            |             |
|----|-------------|------------|-------------|
| Be | -1.05898000 | 0.00000000 | -1.40650900 |
| Be | 1.05898000  | 0.00000000 | -1.40650900 |
| Be | 1.01723200  | 1.52910400 | -0.08530500 |
| Be | -1.01723200 | 1.52910400 | -0.08530500 |
| H  | 0.00000000  | 0.00000000 | -2.46454900 |
| H  | 0.00000000  | 2.48992300 | -0.52004700 |
| H  | 1.87206000  | 1.22636900 | -1.22450300 |
| H  | -1.87206000 | 1.22636900 | -1.22450300 |

|    |             |             |             |
|----|-------------|-------------|-------------|
| C  | 0.00000000  | 0.00000000  | 0.05064400  |
| Be | 1.01723200  | -1.52910400 | -0.08530500 |
| Be | -1.01723200 | -1.52910400 | -0.08530500 |
| Be | 0.00000000  | 1.01017000  | 1.58336000  |
| H  | 0.00000000  | -2.48992300 | -0.52004700 |
| H  | 1.25353400  | -1.79227100 | 1.35373900  |
| H  | -1.25353400 | -1.79227100 | 1.35373900  |
| H  | 1.87206000  | -1.22636900 | -1.22450300 |
| H  | -1.87206000 | -1.22636900 | -1.22450300 |
| H  | -1.25353400 | 1.79227100  | 1.35373900  |
| H  | 1.25353400  | 1.79227100  | 1.35373900  |
| Be | 0.00000000  | -1.01017000 | 1.58336000  |
| H  | 0.00000000  | 0.00000000  | 2.63391200  |

**1C**  $C_{2v}$   $CBe_8H_{12}$

|    |             |             |             |
|----|-------------|-------------|-------------|
| Be | -1.43657200 | 1.00788400  | -0.45416900 |
| Be | 0.00000000  | 0.00000000  | 1.87553000  |
| Be | 1.43657200  | 1.00788400  | -0.45416900 |
| Be | 1.43657200  | -1.00788400 | -0.45416900 |
| Be | 0.00000000  | -1.68651100 | 0.86316100  |
| Be | -1.43657200 | -1.00788400 | -0.45416900 |
| Be | 0.00000000  | 0.00000000  | -1.65346900 |
| Be | 0.00000000  | 1.68651100  | 0.86316100  |
| H  | -2.51306400 | 0.00000000  | -0.24355000 |
| H  | 1.11628400  | 1.16476100  | -1.83378600 |
| H  | 0.00000000  | -1.34668400 | 2.35390800  |
| H  | 2.51306400  | 0.00000000  | -0.24355000 |
| H  | -1.11628400 | -1.16476100 | -1.83378600 |
| H  | -1.11628400 | 1.16476100  | -1.83378600 |
| H  | 0.00000000  | 1.34668400  | 2.35390800  |
| H  | 1.26930800  | -2.22128800 | 0.38472100  |
| C  | 0.00000000  | 0.00000000  | 0.17478600  |
| H  | -1.26930800 | -2.22128800 | 0.38472100  |
| H  | -1.26930800 | 2.22128800  | 0.38472100  |
| H  | 1.26930800  | 2.22128800  | 0.38472100  |
| H  | 1.11628400  | -1.16476100 | -1.83378600 |

**1D**  $C_1$   $CBe_8H_{12}$

|    |             |             |             |
|----|-------------|-------------|-------------|
| C  | 0.29711700  | 0.01474300  | -0.22300200 |
| Be | -0.53074100 | -1.55552700 | -0.03289200 |
| Be | -0.83119700 | 0.90760000  | -1.12615600 |
| Be | 0.71200200  | 1.74409600  | -0.15612700 |
| Be | 1.05335900  | -1.12816900 | -1.19499700 |
| Be | -0.55061400 | 0.77682600  | 1.17018000  |
| Be | 0.80618300  | -0.75636000 | 1.31406100  |
| H  | -2.16403000 | 0.58080300  | -1.34610600 |
| H  | -1.97409400 | 0.73529600  | 1.08399300  |
| H  | 0.08420000  | 0.06289400  | 2.27992900  |
| H  | 0.20770000  | -2.07985900 | 1.19775800  |
| H  | -1.93680100 | -1.57357100 | -0.02586000 |
| H  | 2.26982500  | -0.51193900 | 1.24742100  |
| H  | 2.46829700  | -0.79430300 | -1.17175500 |
| H  | -0.15869000 | 2.22411100  | -1.28187300 |
| H  | 0.04592900  | 2.14931600  | 1.08891400  |
| H  | 0.27013200  | -2.31391600 | -1.19000600 |
| Be | -2.52105700 | -0.16274000 | -0.02155300 |
| H  | -3.87246200 | -0.24416500 | 0.03314800  |
| Be | 2.05488000  | 0.18056900  | -0.05617900 |
| H  | 2.20603500  | 1.65169600  | -0.16289800 |

## $2 O_h \text{Be}_8\text{H}_{12}^{2+}$

|    |             |             |             |
|----|-------------|-------------|-------------|
| Be | 1.10085000  | -1.10085000 | 1.10085000  |
| Be | -1.10085000 | -1.10085000 | 1.10085000  |
| Be | -1.10085000 | -1.10085000 | -1.10085000 |
| Be | -1.10085000 | 1.10085000  | -1.10085000 |
| Be | -1.10085000 | 1.10085000  | 1.10085000  |
| Be | 1.10085000  | 1.10085000  | 1.10085000  |
| Be | 1.10085000  | 1.10085000  | -1.10085000 |
| Be | 1.10085000  | -1.10085000 | -1.10085000 |
| H  | 1.74371400  | 0.00000000  | 1.74371400  |
| H  | 1.74371400  | 0.00000000  | -1.74371400 |
| H  | -1.74371400 | 0.00000000  | 1.74371400  |
| H  | -1.74371400 | 0.00000000  | -1.74371400 |
| H  | 1.74371400  | 1.74371400  | 0.00000000  |
| H  | 1.74371400  | -1.74371400 | 0.00000000  |
| H  | -1.74371400 | -1.74371400 | 0.00000000  |
| H  | -1.74371400 | 1.74371400  | 0.00000000  |

|   |            |             |             |
|---|------------|-------------|-------------|
| H | 0.00000000 | 1.74371400  | 1.74371400  |
| H | 0.00000000 | -1.74371400 | 1.74371400  |
| H | 0.00000000 | -1.74371400 | -1.74371400 |
| H | 0.00000000 | 1.74371400  | -1.74371400 |

**2B**  $C_1 Be_8H_{12}^{2+}$

|    |             |             |             |
|----|-------------|-------------|-------------|
| Be | 1.99837000  | 0.09719100  | -1.14636100 |
| Be | 1.98637300  | 0.49790800  | 1.06078700  |
| H  | 2.86777800  | 0.09777900  | -0.00167100 |
| Be | 0.34286400  | -0.94091600 | 1.24445500  |
| Be | 0.36546700  | -1.33802800 | -0.84214000 |
| H  | 0.46034700  | -2.09297900 | 0.38284400  |
| H  | -0.79797100 | -0.76899400 | 2.10378700  |
| H  | -0.77380600 | -1.46300500 | -1.71059100 |
| H  | 1.55004300  | -0.54262300 | 1.92278300  |
| H  | 1.58097400  | -1.18365400 | -1.59857900 |
| Be | -1.69489900 | -0.66141600 | -0.99258100 |
| Be | -1.73715000 | 1.39237300  | -0.25938600 |
| Be | -1.72485200 | -0.27485300 | 1.15458100  |
| Be | 0.43304800  | 1.28886300  | -0.23033900 |
| H  | 1.23286800  | 1.26179400  | -1.44697000 |
| H  | 1.22419000  | 1.69446000  | 0.92340500  |
| H  | -2.16602300 | 0.63593200  | -1.40625100 |
| H  | -2.24976900 | -1.21144000 | 0.20709600  |
| H  | -2.19419200 | 1.08543400  | 1.07084500  |
| H  | -0.61132500 | 2.24280600  | -0.40276300 |

**2C**  $C_1 Be_8H_{12}^{2+}$

|    |             |             |             |
|----|-------------|-------------|-------------|
| Be | 0.07597100  | 0.87904700  | -0.65324600 |
| Be | -4.83882200 | 0.21810800  | 0.05264200  |
| Be | 1.44324200  | -0.29014900 | 1.30377100  |
| Be | 1.04831100  | -0.82179700 | -1.25719300 |
| Be | -1.98976500 | -0.03221100 | 0.04462100  |
| Be | 2.83107000  | -0.16594900 | -0.29511200 |
| Be | -0.08984900 | -1.34759100 | 0.42585000  |
| Be | 1.74369200  | 1.57081800  | 0.42042300  |
| H  | 0.69852300  | 2.14642700  | -0.38431800 |
| H  | 0.51109800  | -1.30134800 | 1.73675600  |

|   |             |             |             |
|---|-------------|-------------|-------------|
| H | -3.41713900 | 0.09554100  | 0.05997200  |
| H | 0.25101600  | 0.20053400  | -1.92796700 |
| H | -6.14839200 | 0.33310900  | 0.05627600  |
| H | 1.53912900  | 1.09072300  | 1.77342700  |
| H | 0.38721000  | -2.01693200 | -0.76004600 |
| H | 2.72819100  | -0.86012700 | 0.95394000  |
| H | -1.54490600 | -1.28832800 | 0.47398100  |
| H | 2.97500000  | 1.26717600  | -0.26617000 |
| H | 2.45900600  | -0.83670400 | -1.51054000 |
| H | -1.33413600 | 1.12882200  | -0.37233100 |

### 2D $C_1$ Be<sub>8</sub>H<sub>12</sub><sup>2+</sup>

|    |             |             |             |
|----|-------------|-------------|-------------|
| Be | 1.75979400  | 1.23183200  | -0.73676500 |
| Be | -2.40594700 | 1.21513000  | 0.00237700  |
| Be | 1.04655700  | -0.67987500 | -1.13166700 |
| Be | 0.56249300  | -0.45461200 | 1.33682500  |
| Be | -0.62455400 | -1.46869500 | -0.13579500 |
| Be | -2.87224800 | -0.63852400 | -0.17843400 |
| Be | -0.04234100 | 1.26517900  | 0.39177700  |
| Be | 2.49920100  | -0.44131600 | 0.42326000  |
| H  | -2.03945800 | -1.72633300 | -0.40105800 |
| H  | -0.24049300 | -1.66247500 | 1.24414700  |
| H  | 1.41895000  | 0.48298500  | -1.93426700 |
| H  | -1.24254100 | 1.95495000  | -0.07974300 |
| H  | 1.93215500  | -0.64380600 | 1.72292100  |
| H  | 2.20613400  | -1.38290800 | -0.61048200 |
| H  | -2.66758300 | 0.18660600  | 1.01035900  |
| H  | 0.05408200  | -1.68052300 | -1.39287200 |
| H  | 0.92125800  | 2.21066800  | -0.11363100 |
| H  | -0.01554600 | 0.80869400  | 1.77278500  |
| H  | -2.94366400 | 0.46196400  | -1.13527600 |
| H  | 2.92488800  | 0.87369800  | 0.03080700  |

### 3 $O_h$ NBe<sub>3</sub>H<sub>12</sub><sup>+</sup>

|    |             |             |             |
|----|-------------|-------------|-------------|
| Be | 1.04035600  | -1.04035600 | 1.04035600  |
| Be | -1.04035600 | -1.04035600 | 1.04035600  |
| Be | -1.04035600 | -1.04035600 | -1.04035600 |
| Be | -1.04035600 | 1.04035600  | -1.04035600 |

|    |             |             |             |
|----|-------------|-------------|-------------|
| Be | -1.04035600 | 1.04035600  | 1.04035600  |
| Be | 1.04035600  | 1.04035600  | 1.04035600  |
| Be | 1.04035600  | 1.04035600  | -1.04035600 |
| Be | 1.04035600  | -1.04035600 | -1.04035600 |
| H  | 1.75191400  | 0.00000000  | 1.75191400  |
| H  | 1.75191400  | 0.00000000  | -1.75191400 |
| H  | -1.75191400 | 0.00000000  | 1.75191400  |
| H  | -1.75191400 | 0.00000000  | -1.75191400 |
| H  | 1.75191400  | 1.75191400  | 0.00000000  |
| H  | 1.75191400  | -1.75191400 | 0.00000000  |
| H  | -1.75191400 | -1.75191400 | 0.00000000  |
| H  | -1.75191400 | 1.75191400  | 0.00000000  |
| N  | 0.00000000  | 0.00000000  | 0.00000000  |
| H  | 0.00000000  | 1.75191400  | 1.75191400  |
| H  | 0.00000000  | -1.75191400 | 1.75191400  |
| H  | 0.00000000  | -1.75191400 | -1.75191400 |
| H  | 0.00000000  | 1.75191400  | -1.75191400 |

**3B**  $C_{2v}$   $NBe_8H_{12}^+$

|    |             |             |             |
|----|-------------|-------------|-------------|
| Be | -1.06224900 | 0.00000000  | -1.39751800 |
| Be | 1.06224900  | 0.00000000  | -1.39751800 |
| Be | 1.03607600  | 1.56500600  | -0.08736600 |
| Be | -1.03607600 | 1.56500600  | -0.08736600 |
| H  | 0.00000000  | 0.00000000  | -2.41332000 |
| H  | 0.00000000  | 2.45219200  | -0.54811000 |
| H  | 1.87474300  | 1.19043600  | -1.18040900 |
| H  | -1.87474300 | 1.19043600  | -1.18040900 |
| Be | 1.03607600  | -1.56500600 | -0.08736600 |
| Be | -1.03607600 | -1.56500600 | -0.08736600 |
| Be | 0.00000000  | 1.01483900  | 1.58264400  |
| H  | 0.00000000  | -2.45219200 | -0.54811000 |
| H  | 1.26394600  | -1.71332400 | 1.33683200  |
| H  | -1.26394600 | -1.71332400 | 1.33683200  |
| H  | 1.87474300  | -1.19043600 | -1.18040900 |
| H  | -1.87474300 | -1.19043600 | -1.18040900 |
| H  | -1.26394600 | 1.71332400  | 1.33683200  |
| H  | 1.26394600  | 1.71332400  | 1.33683200  |
| Be | 0.00000000  | -1.01483900 | 1.58264400  |
| H  | 0.00000000  | 0.00000000  | 2.59038400  |



|   |            |            |            |
|---|------------|------------|------------|
| N | 0.00000000 | 0.00000000 | 0.03004500 |
|---|------------|------------|------------|

### 3C $C_1$ NBe<sub>8</sub>H<sub>12</sub><sup>+</sup>

|    |             |             |             |
|----|-------------|-------------|-------------|
| N  | 0.31661900  | -0.02635200 | -0.16234600 |
| Be | -0.66682200 | -1.49508400 | 0.12049000  |
| Be | -0.97751600 | 0.99473200  | -0.74434400 |
| Be | 0.91549900  | 1.66510800  | -0.35323300 |
| Be | 0.75683100  | -1.15932900 | -1.26398600 |
| Be | -0.22996300 | 0.97500500  | 1.20743200  |
| Be | 0.85059900  | -0.77510400 | 1.34588000  |
| H  | -2.06043300 | 0.37217100  | -1.37533400 |
| H  | -1.59448000 | 1.19521900  | 0.65954500  |
| H  | 0.20889400  | 0.14660000  | 2.29286100  |
| H  | 0.13094100  | -2.02099400 | 1.25618300  |
| H  | -2.03989900 | -1.35332000 | 0.34860700  |
| H  | 2.29854600  | -0.67460800 | 1.09607500  |
| H  | 2.17685600  | -1.04343200 | -1.35478300 |
| H  | -0.14203100 | 2.09593000  | -1.27390800 |
| H  | 0.62146400  | 2.12628100  | 0.99115200  |
| H  | -0.16886300 | -2.21617200 | -1.12649200 |
| Be | -2.71623000 | -0.12113700 | -0.11053600 |
| H  | -3.97442700 | 0.11715600  | 0.24159500  |
| Be | 2.06800400  | -0.05919500 | -0.21900500 |
| H  | 2.32548200  | 1.33965500  | -0.54988100 |

### 3D $C_{2v}$ NBe<sub>8</sub>H<sub>12</sub><sup>+</sup>

|    |             |             |             |
|----|-------------|-------------|-------------|
| Be | -1.47852600 | 1.02299000  | -0.46195800 |
| Be | 0.00000000  | 0.00000000  | 1.83682200  |
| Be | 1.47852600  | 1.02299000  | -0.46195800 |
| Be | 1.47852600  | -1.02299000 | -0.46195800 |
| Be | 0.00000000  | -1.71450100 | 0.84996300  |
| Be | -1.47852600 | -1.02299000 | -0.46195800 |
| Be | 0.00000000  | 0.00000000  | -1.65775600 |
| Be | 0.00000000  | 1.71450100  | 0.84996300  |
| H  | -2.47960400 | 0.00000000  | -0.16955000 |
| H  | 1.08294300  | 1.15029800  | -1.79974000 |
| H  | 0.00000000  | -1.33384400 | 2.29076500  |
| H  | 2.47960400  | 0.00000000  | -0.16955000 |

|   |             |             |             |
|---|-------------|-------------|-------------|
| H | -1.08294300 | -1.15029800 | -1.79974000 |
| H | -1.08294300 | 1.15029800  | -1.79974000 |
| H | 0.00000000  | 1.33384400  | 2.29076500  |
| H | 1.26990600  | -2.18531700 | 0.38686900  |
| N | 0.00000000  | 0.00000000  | 0.18348800  |
| H | -1.26990600 | -2.18531700 | 0.38686900  |
| H | -1.26990600 | 2.18531700  | 0.38686900  |
| H | 1.26990600  | 2.18531700  | 0.38686900  |
| H | 1.08294300  | -1.15029800 | -1.79974000 |
